# Supplementary material
Source: publisher site journal article supplement (https://static.cambridge.org/content/id/urn:cambridge.org:id:article:S0008423913000632/resource/name/S0008423913000632GodboutAppendixD.pdf)
Supplement: Supplementary file 1 [file S0008423913000632GodboutAppendixD.pdf]

## Appendix D: Second Dimension Divisions in the Canadian House of Commons (1867-1908).

| Vote     | Date       | APRE  | Title                                                                                                                                                                               | Issue                             | Sponsor        | Question                 |
|----------|------------|-------|-------------------------------------------------------------------------------------------------------------------------------------------------------------------------------------|-----------------------------------|----------------|--------------------------|
| H01S1V02 | 12.11.1867 | 0.316 | Supply-reform                                                                                                                                                                       | Democratic Reform                 | Government     | Speaker Leaves the Chair |
|          |            |       | Amendment to the Report of the Committee of the whole House to consider certain proposed Resolutions for the incorporation of Rupert's Land and the Northwest Territory with Canada |                                   |                |                          |
| H01S1V03 | 12.12.1867 | 0.485 | Northwest Territory with Canada                                                                                                                                                     | Province                          | Government     | Opposition Amendment     |
| H01S1V04 | 12.14.1867 | 0.459 | Ways and Means Resolutions (duty)                                                                                                                                                   | Duty/Tariffs/Trade                | Government     | Opposition Amendment     |
| H01S1V07 | 12.18.1867 | 0.308 | Bill respecting the inland revenues                                                                                                                                                 | Duty/Tariffs/Trade                | Government     | Opposition Amendment     |
| H01S1V09 | 12.19.1867 | 0.333 | Bill respecting banks (interests)                                                                                                                                                   | Banking                           | Government     | Opposition Amendment     |
| H01S1V17 | 04.30.1868 | 0.206 | Resolution Nova Scotia-Grievance                                                                                                                                                    | Province                          | Government     | Opposition Amendment     |
| H01S1V18 | 04.30.1868 | 0.364 | Resolution Nova Scotia-Grievance                                                                                                                                                    | Province                          | Government     | Government Amendment     |
| H01S1V23 | 05.01.1868 | 0.700 | Resolution duty reform                                                                                                                                                              | Duty/Tariffs/Trade                | Government     | Opposition Amendment     |
| H01S1V26 | 05.05.1868 | 0.361 | Resolution salary Governor General                                                                                                                                                  | Civil service/Military/Management | Private Member | Public Bill              |
| H01S1V29 | 05.06.1868 | 0.370 | An act for the relief of Joseph Frederick Whiteaves                                                                                                                                 | Divorce/Marriage                  | Private Member | Private Bill             |
| H01S1V36 | 05.13.1868 | 0.313 | An act for the relief of Joseph Frederick Whiteaves                                                                                                                                 | Divorce/Marriage                  | Private Member | Private Bill             |
| H01S1V41 | 05.15.1868 | 0.219 | Bill respecting the militia and defence of the Dominion of Canada                                                                                                                   | Civil service/Military/Management | Government     | Government Amendment     |
| H01S1V45 | 05.16.1868 | 0.286 | Bill respecting the militia and defence of the Dominion of Canada                                                                                                                   | Civil service/Military/Management | Government     | Government Amendment     |
| H01S1V46 | 05.16.1868 | 0.269 | Bill respecting the militia and defence of the Dominion of Canada                                                                                                                   | Civil service/Military/Management | Government     | Government Amendment     |
| H01S1V51 | 05.18.1868 | 0.409 | Bill imposing duties of customs and the tariff of duties payable under it: Corn                                                                                                     | Duty/Tariffs/Trade                | Government     | Government Amendment     |
| H01S1V53 | 05.19.1868 | 0.857 | Bill imposing duties of customs and the tariff of duties payable for tobacco                                                                                                        | Duty/Tariffs/Trade                | Government     | Opposition Amendment     |
| H01S1V54 | 05.19.1868 | 0.375 | Bill imposing duties of customs and the tariff of duties payable for tobacco                                                                                                        | Duty/Tariffs/Trade                | Government     | Opposition Amendment     |
| H01S1V55 | 05.20.1868 | 0.250 | Bill respecting insurance companies (provincial jurisdiction)                                                                                                                       | Constitution/Federalism           | Government     | Opposition Amendment     |
|          |            |       | Bill to confirm and give effect to a certain agreement between the government of Canada and the Great Western Railway Company                                                       |                                   |                |                          |
| H01S2V02 | 05.12.1869 | 0.333 | Company                                                                                                                                                                             | Railways                          | Government     | Government Amendment     |
| H01S2V06 | 05.19.1869 | 0.579 | Reciprocity-US                                                                                                                                                                      | Duty/Tariffs/Trade                | Government     | Government Amendment     |
| H01S2V12 | 05.26.1869 | 0.245 | Act for the Relief of John Horace Stevenson                                                                                                                                         | Divorce/Marriage                  | Private Member | Private Bill             |
|          |            |       | Resolutions respecting the acquisition of the territory and the other rights of the Hudson's Bay company in Rupert's Land                                                           |                                   |                |                          |
| H01S2V13 | 05.28.1869 | 0.667 | Hudson's Bay company in Rupert's Land                                                                                                                                               | Province                          | Government     | Opposition Amendment     |
| H01S2V15 | 06.03.1869 | 0.300 | Resolutions funding hospitals Quebec                                                                                                                                                | Constitution/Federalism           | Private Member | Government Amendment     |
| H01S2V19 | 06.04.1869 | 0.306 | An Act respecting patents of invention                                                                                                                                              | Duty/Tariffs/Trade                | Government     | Government Amendment     |
| H01S2V29 | 06.13.1869 | 0.667 | Act to the affairs of Nova Scotia                                                                                                                                                   | Province                          | Government     | Resolution               |
| H01S2V37 | 06.16.1869 | 0.714 | Act to the affairs of Nova Scotia                                                                                                                                                   | Province                          | Government     | Opposition Amendment     |
| H01S2V40 | 06.18.1869 | 0.386 | Supply-resolutions-Warden salary                                                                                                                                                    | Civil service/Military/Management | Government     | Government Amendment     |
| H01S3V17 | 04.05.1870 | 0.375 | Bill respecting banks and banking (interests)                                                                                                                                       | Banking                           | Government     | Opposition Amendment     |
| H01S3V19 | 04.07.1870 | 0.429 | Bill respecting banks and banking (interests)                                                                                                                                       | Banking                           | Government     | Opposition Amendment     |
| H01S3V25 | 04.20.1870 | 0.514 | Bill respecting the Canada Central Railway Company                                                                                                                                  | Railways                          | Government     | Opposition Amendment     |
| H01S3V26 | 04.20.1870 | 0.500 | Bill respecting the Canada Central Railway Company                                                                                                                                  | Railways                          | Government     | Opposition Amendment     |
| H01S3V27 | 04.20.1870 | 0.268 | Resolutions Civil Service retirement                                                                                                                                                | Civil service/Military/Management | Government     | Opposition Amendment     |

|          |            |       |                                                                                                                                                                                                       |                                   |                |                             |
|----------|------------|-------|-------------------------------------------------------------------------------------------------------------------------------------------------------------------------------------------------------|-----------------------------------|----------------|-----------------------------|
| H01S3V32 | 04.22.1870 | 0.262 | Bill respecting interest                                                                                                                                                                              | Banking                           | Government     | Opposition Amendment        |
| H01S3V33 | 04.22.1870 | 0.262 | Bill respecting interest                                                                                                                                                                              | Banking                           | Government     | Second Reading              |
| H01S3V46 | 04.30.1870 | 0.211 | Ways and means, duty coal-coke                                                                                                                                                                        | Duty/Tariffs/Trade                | Government     | Government Amendment        |
| H01S3V49 | 04.30.1870 | 0.405 | Ways and means, duty tobacco                                                                                                                                                                          | Duty/Tariffs/Trade                | Government     | Opposition Amendment        |
| H01S3V05 | 03.17.1870 | 0.286 | Resolutions renewing charter banks                                                                                                                                                                    | Banking                           | Government     | Government Amendment        |
| H01S3V50 | 05.04.1870 | 0.245 | Resolutions Civil Service retirement                                                                                                                                                                  | Civil service/Military/Management | Government     | Opposition Amendment        |
| H01S3V59 | 05.10.1870 | 0.286 | Act to establish and provide for the Government of the Province of Manitoba                                                                                                                           | Province                          | Government     | Opposition Amendment        |
| H01S3V61 | 05.10.1870 | 0.269 | Act to establish and provide for the Government of the Province of Manitoba                                                                                                                           | Province                          | Government     | Government Amendment        |
| H01S3V62 | 05.10.1870 | 0.298 | Act to establish and provide for the Government of the Province of Manitoba                                                                                                                           | Province                          | Government     | Opposition Amendment        |
| H01S3V63 | 05.10.1870 | 0.286 | Act to establish and provide for the Government of the Province of Manitoba                                                                                                                           | Province                          | Government     | Government Amendment        |
| H01S3V65 | 05.10.1870 | 0.325 | Act to establish and provide for the Government of the Province of Manitoba                                                                                                                           | Province                          | Government     | Government Amendment        |
| H01S3V66 | 05.10.1870 | 0.342 | Act to establish and provide for the Government of the Province of Manitoba                                                                                                                           | Province                          | Government     | Opposition Amendment        |
| H01S3V67 | 05.10.1870 | 0.293 | Act to establish and provide for the Government of the Province of Manitoba                                                                                                                           | Province                          | Government     | Government Amendment        |
| H01S3V69 | 05.10.1870 | 0.341 | Act to establish and provide for the Government of the Province of Manitoba                                                                                                                           | Province                          | Government     | Government Amendment        |
| H01S3V70 | 05.10.1870 | 0.324 | Act to establish and provide for the Government of the Province of Manitoba                                                                                                                           | Province                          | Government     | Opposition Amendment        |
| H01S3V71 | 05.10.1870 | 0.353 | Act to establish and provide for the Government of the Province of Manitoba                                                                                                                           | Province                          | Government     | Opposition Amendment        |
| H01S3V72 | 05.11.1870 | 0.308 | Supply Bill for granting to Her Majesty, certain sums of money required to defray the expenses of the publication service, for the financial year amendment not to pay for military expedition in NWT | Province                          | Government     | Opposition Amendment        |
| H01S4V11 | 03.17.1871 | 0.320 | Bill to establish one uniform currency for the dominion of Canada                                                                                                                                     | Banking                           | Government     | Opposition Amendment        |
| H01S4V12 | 03.22.1871 | 0.643 | Supply Resolution: Duty                                                                                                                                                                               | Duty/Tariffs/Trade                | Government     | Government Amendment        |
| H01S4V13 | 03.22.1871 | 0.273 | Supply Resolution: Duty                                                                                                                                                                               | Duty/Tariffs/Trade                | Government     | Opposition Amendment        |
| H01S4V34 | 04.04.1871 | 0.579 | Bill to amend the acts relating to duties of customs                                                                                                                                                  | Duty/Tariffs/Trade                | Government     | Government Amendment        |
| H01S4V35 | 04.04.1871 | 0.674 | Bill to amend the acts relating to duties of customs                                                                                                                                                  | Duty/Tariffs/Trade                | Government     | Opposition Amendment        |
| H01S4V36 | 04.04.1871 | 0.486 | Bill to amend the acts relating to duties of customs                                                                                                                                                  | Duty/Tariffs/Trade                | Government     | Opposition Amendment        |
| H01S4V42 | 04.08.1871 | 0.211 | Bill to make temporary provision for the election of members to serve in the House of Commons of Canada, dual representation                                                                          | Democratic Reform                 | Government     | Opposition Amendment        |
| H01S4V47 | 04.10.1871 | 0.422 | Constitution of committee for inquiry murder: Thomas Scott                                                                                                                                            | NWT/Manitoba Rebellion            | Government     | Opposition Amendment        |
| H01S4V05 | 03.13.1871 | 0.688 | Debt -Quebec                                                                                                                                                                                          | Province                          | Private Member | Address to Governor General |
| H01S4V53 | 04.11.1871 | 0.273 | Resolution Admission BC                                                                                                                                                                               | Province                          | Government     | Opposition Amendment        |
| H01S4V54 | 04.12.1871 | 0.385 | Resolution supply restitution for the murder Thomas Scott                                                                                                                                             | NWT/Manitoba Rebellion            | Government     | Speaker Leaves the Chair    |
| H01S4V57 | 04.12.1871 | 0.417 | Resolution 21 supply restitution for the murder Thomas Scott                                                                                                                                          | NWT/Manitoba Rebellion            | Government     | Government Amendment        |
| H01S4V06 | 03.13.1871 | 0.360 | Debt -Quebec                                                                                                                                                                                          | Province                          | Private Member | Address to Governor General |
| H01S4V07 | 03.13.1871 | 0.733 | Debt -Quebec                                                                                                                                                                                          | Province                          | Private Member | Address to Governor General |
| H01S5V25 | 05.29.1872 | 0.310 | Resolution Disallow New Brunswick School Law                                                                                                                                                          | Religion                          | Private Member | Address to Governor General |
| H01S5V26 | 05.29.1872 | 0.421 | Resolution Disallow New Brunswick School Law                                                                                                                                                          | Religion                          | Private Member | Address to Governor General |
| H01S5V27 | 05.31.1872 | 0.333 | Bill respecting the Canadian Pacific                                                                                                                                                                  | Railways                          | Government     | Opposition Amendment        |

|          |            |       |                                                                                                                                                                 |                                   |                |                      |
|----------|------------|-------|-----------------------------------------------------------------------------------------------------------------------------------------------------------------|-----------------------------------|----------------|----------------------|
|          |            |       | Railway (location)                                                                                                                                              |                                   |                |                      |
| H01S5V28 | 05.31.1872 | 0.800 | Bill respecting the Canadian Pacific Railway (location)                                                                                                         | Railways                          | Government     | Opposition Amendment |
| H01S5V33 | 06.03.1872 | 0.250 | An act for the relief of John Robert Martin                                                                                                                     | Divorce/Marriage                  | Private Member | Private Bill         |
| H01S5V34 | 06.03.1872 | 0.250 | An act for the relief of John Robert Martin                                                                                                                     | Divorce/Marriage                  | Private Member | Private Bill         |
| H01S5V53 | 06.10.1872 | 0.238 | Bill to readjust the representation in the House of Commons (Montreal riding)                                                                                   | Province                          | Government     | Opposition Amendment |
| H02S1V05 | 03.27.1873 | 0.314 | Bill to render member of the legislative councils and assemblies of the provinces [...] ineligible for sitting or voting in the House of Commons of Canada      | Democratic Reform                 | Private Member | Public Bill          |
| H02S1V06 | 03.27.1873 | 0.288 | Bill to render member of the legislative councils and assemblies of the provinces [...] ineligible for sitting or voting in the House of Commons of Canada      | Democratic Reform                 | Private Member | Public Bill          |
| H02S1V09 | 04.18.1873 | 0.556 | That the article published in the newspaper called the <i>Morning Freeman</i> [...] is a scandalous false and malicious libel [...] upon the honor of the House | Democratic Reform                 | Private Member | Motion               |
| H02S1V12 | 04.21.1873 | 0.625 | Bill to extend the provisions of the Grand Trunk Arrangements Act of 1862                                                                                       | Railways                          | Government     | Second Reading       |
| H02S1V13 | 04.24.1873 | 0.400 | Act for the relief of John Robert Martin                                                                                                                        | Divorce/Marriage                  | Private Member | Private Bill         |
| H02S1V14 | 04.24.1873 | 0.400 | Act for the relief of John Robert Martin                                                                                                                        | Divorce/Marriage                  | Private Member | Private Bill         |
| H02S1V15 | 04.30.1872 | 0.375 | Act for the relief of John Robert Martin                                                                                                                        | Divorce/Marriage                  | Private Member | Private Bill         |
| H02S1V16 | 04.30.1873 | 0.375 | Act for the relief of John Robert Martin                                                                                                                        | Divorce/Marriage                  | Private Member | Private Bill         |
| H02S1V17 | 05.02.1873 | 0.397 | Act for the relief of John Robert Martin                                                                                                                        | Divorce/Marriage                  | Private Member | Private Bill         |
| H02S1V18 | 05.02.1873 | 0.397 | Act for the relief of John Robert Martin                                                                                                                        | Divorce/Marriage                  | Private Member | Private Bill         |
| H02S1V20 | 05.03.1873 | 0.488 | Insolvency Act                                                                                                                                                  | Bankruptcy                        | Government     | Opposition Amendment |
| H03S1V02 | 04.16.1874 | 0.406 | Question: That Louis Riel [...] having been charged with murder Manitoba-amnesty [...]                                                                          | NWT/Manitoba Rebellion            | Private Member | Government Amendment |
| H03S1V03 | 04.16.1874 | 0.492 | Question: That Louis Riel [...] having been charged with murder Manitoba-amnesty [...]                                                                          | NWT/Manitoba Rebellion            | Private Member | Motion               |
| H03S1V07 | 05.20.1874 | 0.690 | Bill to make further provision for the management of permanent building societies in the Dominion of Canada                                                     | Civil service/Military/Management | Government     | Government Amendment |
| H03S1V08 | 05.20.1874 | 0.600 | Bill to provide for the construction of the Canadian Pacific Railway                                                                                            | Railways                          | Government     | Opposition Amendment |
| H03S2V01 | 02.13.1875 | 0.217 | Report of the Committee on the Question Arising out of the North-West Territories troubles Lépine Pardon                                                        | NWT/Manitoba Rebellion            | Government     | Opposition Amendment |

|          |            |       |                                                                                                                         |                        |                |                          |
|----------|------------|-------|-------------------------------------------------------------------------------------------------------------------------|------------------------|----------------|--------------------------|
| H03S2V03 | 02.24.1875 | 0.696 | Report of the committee on the question arising out of the North-West Territories troubles Lépine Pardon Expulsion Riel | NWT/Manitoba Rebellion | Government     | Opposition Amendment     |
| H03S2V06 | 03.01.1875 | 0.250 | Resolution Senate Reform                                                                                                | Democratic Reform      | Government     | Motion                   |
| H03S2V11 | 03.13.1875 | 0.283 | Relief of Henry William Peterson                                                                                        | Divorce/Marriage       | Private Member | Private Bill             |
| H03S2V25 | 03.29.1875 | 0.266 | Bill to provide for the construction of a line of railway from Esquimalt to Nanaimo in BC                               | Railways               | Government     | Opposition Amendment     |
| H03S2V26 | 03.29.1875 | 0.266 | Bill to provide for the construction of a line of railway from Esquimalt to Nanaimo in BC                               | Railways               | Government     | Third Reading            |
| H03S2V30 | 03.30.1875 | 0.300 | Bill to establish a Supreme Court and a Court of Exchequer for the Dominion of Canada                                   | Democratic Reform      | Government     | Opposition Amendment     |
| H03S2V34 | 04.02.1875 | 0.259 | Supply Resolution 41Repay Expense DA Smith NWT                                                                          | NWT/Manitoba Rebellion | Government     | Opposition Amendment     |
| H03S4V01 | 02.28.1877 | 0.220 | Bill to repeal the insolvency Act in Canada                                                                             | Bankruptcy             | Government     | Speaker Leaves the Chair |
| H03S4V04 | 03.16.1877 | 0.500 | Act for the relief of Mary Jane Bates                                                                                   | Divorce/Marriage       | Private Member | Private Bill             |
| H03S4V05 | 03.19.1877 | 0.522 | Act for the relief of Walter Scott                                                                                      | Divorce/Marriage       | Private Member | Private Bill             |
| H03S4V07 | 03.23.1877 | 0.509 | Act for the relief of Martha Jemima Hawkshaw Holiwell                                                                   | Divorce/Marriage       | Private Member | Private Bill             |
| H03S4V08 | 03.23.1877 | 0.419 | Act for the relief of Walter Scott                                                                                      | Divorce/Marriage       | Private Member | Private Bill             |
| H03S4V09 | 03.23.1877 | 0.440 | Act for the relief of Mary Jane Bates                                                                                   | Divorce/Marriage       | Private Member | Private Bill             |
| H03S4V13 | 03.26.1877 | 0.438 | Act for the relief of Martha Jemima Hawkshaw Holiwell                                                                   | Divorce/Marriage       | Private Member | Private Bill             |
| H03S4V14 | 03.28.1877 | 0.350 | Act for the relief of Walter Scott                                                                                      | Divorce/Marriage       | Private Member | Private Bill             |
| H03S4V15 | 03.28.1877 | 0.378 | Act for the relief of Mary Jane Bates                                                                                   | Divorce/Marriage       | Private Member | Private Bill             |
| H03S5V05 | 03.27.1878 | 0.314 | Act for the relief of George Frothingham                                                                                | Divorce/Marriage       | Private Member | Private Bill             |
| H03S5V06 | 03.27.1878 | 0.288 | Act for the relief of Hugh Hunter                                                                                       | Divorce/Marriage       | Private Member | Private Bill             |
| H03S5V08 | 03.29.1878 | 0.380 | Act for the Relief of John Frothingham Johnston                                                                         | Divorce/Marriage       | Private Member | Private Bill             |
| H03S5V10 | 04.03.1878 | 0.356 | Act for the relief of Hugh Hunter                                                                                       | Divorce/Marriage       | Private Member | Private Bill             |
| H03S5V13 | 04.09.1878 | 0.679 | Supply-Duty                                                                                                             | Duty/Tariffs/Trade     | Government     | Speaker Leaves the Chair |
| H03S5V17 | 04.10.1878 | 0.379 | An act for the relief of Victoria Elizabeth Lyon                                                                        | Divorce/Marriage       | Private Member | Private Bill             |
| H03S5V19 | 04.12.1878 | 0.413 | An act for the relief of Victoria Elizabeth Lyon                                                                        | Divorce/Marriage       | Private Member | Private Bill             |
| H03S5V22 | 04.17.1878 | 0.545 | An act for the relief of Victoria Elizabeth Lyon                                                                        | Divorce/Marriage       | Private Member | Private Bill             |
| H03S5V24 | 04.26.1878 | 0.385 | Supply-Duty                                                                                                             | Duty/Tariffs/Trade     | Government     | Speaker Leaves the Chair |
| H03S5V33 | 05.07.1878 | 0.290 | Question: subsidy granted to the Canadian Pacific Railway                                                               | Railways               | Government     | Motion                   |
| H04S1V10 | 04.28.1879 | 0.698 | Bill taxing the rate of interest in Canada, and prohibiting usury                                                       | Banking                | Private Member | Public Bill              |
| H04S1V11 | 04.29.1879 | 0.384 | Insolvency Act                                                                                                          | Bankruptcy             | Private Member | Public Bill              |
| H04S1V12 | 04.29.1879 | 0.379 | Insolvency Act                                                                                                          | Bankruptcy             | Private Member | Public Bill              |
| H04S1V14 | 05.05.1879 | 0.377 | Bill to repeal the insolvency laws now in force in the Dominion of Canada                                               | Bankruptcy             | Private Member | Public Bill              |
| H04S2V03 | 02.26.1880 | 0.345 | Amend Bill to repeal the Supreme and Exchequer Court Act                                                                | Democratic Reform      | Private Member | Public Bill              |
| H04S2V04 | 03.04.1880 | 0.368 | Bill to legalize marriage with the sister of a deceased wife                                                            | Divorce/Marriage       | Private Member | Private Bill             |
| H04S2V07 | 03.31.1880 | 0.407 | Bill to legalize marriage with the sister of a deceased wife                                                            | Divorce/Marriage       | Private Member | Private Bill             |

|          |            |       |                                                                                                                                                                                        |                         |                |                          |
|----------|------------|-------|----------------------------------------------------------------------------------------------------------------------------------------------------------------------------------------|-------------------------|----------------|--------------------------|
| H04S2V09 | 04.07.1880 | 0.333 | Fisheries vested in the Federal Government                                                                                                                                             | Constitution/Federalism | Private Member | Motion                   |
| H04S3V33 | 02.04.1881 | 0.206 | Insolvent Act of 1875 and Amending Acts                                                                                                                                                | Bankruptcy              | Government     | Government Amendment     |
| H04S3V35 | 02.10.1881 | 0.641 | Bill to repeal the Supreme and Exchequer Court Act                                                                                                                                     | Bankruptcy              | Private Member | Public Bill              |
| H04S3V37 | 02.15.1881 | 0.259 | Canada Temperance Act of 1878                                                                                                                                                          | Prohibition             | Private Member | Public Bill              |
| H04S3V40 | 03.07.1881 | 0.275 | Toronto Railway                                                                                                                                                                        | Railways                | Private Member | Private Bill             |
| H04S3V45 | 03.11.1881 | 0.455 | Supply-Duty                                                                                                                                                                            | Duty/Tariffs/Trade      | Government     | Speaker Leaves the Chair |
| H04S4V04 | 03.20.1882 | 0.429 | An act to enlarge and extend the powers of the Credit Foncier Franco-Canadien                                                                                                          | Banking                 | Private Member | Private Bill             |
| H04S4V11 | 04.03.1882 | 0.543 | An act to incorporate the Board for the Management of the Temporalities Fund of the Presbyterian Church of Canada in connection with the Church of Scotland                            | Religion                | Private Member | Private Bill             |
| H04S4V16 | 04.17.1882 | 0.275 | Bill to consolidate and amend the acts relating to the Montreal Telegraph Company                                                                                                      | Local Industry          | Private Member | Private Bill             |
| H04S4V18 | 04.21.1882 | 0.382 | Bill for amending the acts relating to the Trust and Loan Company of Canada                                                                                                            | Banking                 | Private Member | Private Bill             |
| H05S1V05 | 03.19.1883 | 0.318 | Bill to incorporate the Loyal Orange Association of British America                                                                                                                    | Religion                | Private Member | Private Bill             |
| H05S1V12 | 04.16.1883 | 0.716 | Bill to incorporate the Loyal Orange Association of British America                                                                                                                    | Religion                | Private Member | Private Bill             |
| H05S1V24 | 05.22.1883 | 0.316 | Bill respecting the sale of intoxicating liquors and the issue of licenses provincial licenses                                                                                         | Prohibition             | Private Member | Public Bill              |
| H05S1V25 | 05.22.1883 | 0.327 | Bill respecting the sale of intoxicating liquors and the issue of licenses provincial licenses                                                                                         | Prohibition             | Private Member | Public Bill              |
| H05S2V18 | 03.05.1884 | 0.323 | An act for the relief of John Graham                                                                                                                                                   | Divorce/Marriage        | Private Member | Private Bill             |
| H05S2V27 | 03.17.1884 | 0.750 | Bill to incorporate the Loyal Orange Association of British America                                                                                                                    | Religion                | Private Member | Private Bill             |
| H05S2V29 | 03.19.1884 | 0.393 | An act for the relief of John Graham                                                                                                                                                   | Divorce/Marriage        | Private Member | Private Bill             |
| H05S2V39 | 04.02.1884 | 0.279 | In the interest of the economy, it is unadvisable to continue the system of paying out of the public funds a body of official reporters and translators of the debate of this House    | Language/Education      | Government     | Opposition Amendment     |
| H05S3V09 | 02.27.1885 | 0.359 | Bill respecting carriers by land                                                                                                                                                       | Railways                | Private Member | Public Bill              |
| H05S3V11 | 03.09.1885 | 0.300 | An act for the relief of Amanda Esther Davis                                                                                                                                           | Divorce/Marriage        | Private Member | Private Bill             |
| H05S3V13 | 03.23.1885 | 0.275 | An act for the relief of Alice Elvira Evans                                                                                                                                            | Divorce/Marriage        | Private Member | Private Bill             |
| H05S3V16 | 04.08.1885 | 0.235 | Bill to further amend the Canada Temperance Act of 1878                                                                                                                                | Prohibition             | Private Member | Public Bill              |
| H05S3V19 | 04.13.1885 | 0.204 | Bill to further amend the Canada Temperance Act of 1878 (medical + religious exemptions)                                                                                               | Prohibition             | Private Member | Public Bill              |
| H05S4V04 | 03.25.1886 | 0.423 | That this House feels it is its duty to express its deep regret that the sentence of death passed upon Louis Riel, convicted of high treason, was allowed to be carried into execution | NWT/Manitoba Rebellion  | Private Member | Motion                   |
| H05S4V16 | 04.28.1886 | 0.611 | Bill to amend the Animal Contagious Diseases Act                                                                                                                                       | Farming                 | Private Member | Government Amendment     |
| H05S4V27 | 05.10.1886 | 0.212 | An act for the relief of Flora Birrell                                                                                                                                                 | Divorce/Marriage        | Private Member | Private Bill             |

|          |            |       |                                                                                                                                                                                                          |                    |                |                          |
|----------|------------|-------|----------------------------------------------------------------------------------------------------------------------------------------------------------------------------------------------------------|--------------------|----------------|--------------------------|
| H05S4V28 | 05.10.1886 | 0.286 | Bill to amend the Dominion Elections Acts, 1874 (Franchise)                                                                                                                                              | Democratic Reform  | Private Member | Public Bill              |
| H06S1V14 | 06.10.1887 | 0.500 | An act for the relief of Marie Louise Noel                                                                                                                                                               | Divorce/Marriage   | Private Member | Private Bill             |
| H06S1V16 | 06.13.1887 | 0.378 | That in the opinion of this House it is expedient to prohibit the manufacture, importation and sale of intoxicating liquors, except for sacramental, medicinal, scientific and mechanical purposes [...] | Prohibition        | Private Member | Motion                   |
| H06S2V08 | 04.26.1888 | 0.318 | Bill to amend the Canada Temperance Act                                                                                                                                                                  | Prohibition        | Private Member | Public Bill              |
| H06S2V13 | 05.14.1888 | 0.618 | An act for the relief of Eleonara Elizabeth Tudor                                                                                                                                                        | Divorce/Marriage   | Private Member | Private Bill             |
| H06S3V06 | 02.20.1889 | 0.479 | An act respecting cruelty to animals                                                                                                                                                                     | Farming            | Private Member | Public Bill              |
| H06S3V11 | 02.28.1889 | 0.522 | An act respecting cruelty to animals                                                                                                                                                                     | Farming            | Private Member | Public Bill              |
| H06S3V12 | 02.28.1889 | 0.511 | An act respecting cruelty to animals                                                                                                                                                                     | Farming            | Private Member | Public Bill              |
| H06S3V14 | 03.13.1889 | 0.600 | An act respecting Queen's College at Kingston                                                                                                                                                            | Language/Education | Private Member | Private Bill             |
| H06S3V16 | 03.20.1889 | 0.411 | Bill to amend the Charter of Incorporation of the Great North-West Central Railway Company                                                                                                               | Railways           | Private Member | Private Bill             |
| H06S3V18 | 03.29.1889 | 0.692 | Supply-Settlement of the Jesuits' estates                                                                                                                                                                | Religion           | Private Member | Motion                   |
| H06S3V23 | 04.15.1889 | 0.200 | An act for the relief of William Gordon Lowry                                                                                                                                                            | Divorce/Marriage   | Government     | Speaker Leaves the Chair |
| H06S4V06 | 02.18.1890 | 0.629 | Bill to further amend the revised statutes of Canada respecting the North West Territories [...] that the official use of the French and English languages [...]                                         | Language/Education | Private Member | Public Bill              |
| H06S4V11 | 02.27.1890 | 0.494 | An act respecting cruelty to animals                                                                                                                                                                     | Farming            | Government     | Government Amendment     |
| H06S4V12 | 03.03.1890 | 0.210 | Bill to incorporate the Grand Orange Lodge of British America                                                                                                                                            | Religion           | Private Member | Private Bill             |
| H06S4V13 | 03.03.1890 | 0.773 | Bill to incorporate the Grand Orange Lodge of British America                                                                                                                                            | Religion           | Private Member | Private Bill             |
| H06S4V14 | 03.03.1890 | 0.217 | Bill to incorporate the Grand Orange Lodge of British America                                                                                                                                            | Religion           | Private Member | Private Bill             |
| H06S4V27 | 04.21.1890 | 1.000 | Act for the relief of Hugh Forbes Keefer                                                                                                                                                                 | Divorce/Marriage   | Private Member | Private Bill             |
| H06S4V32 | 05.01.1890 | 0.219 | Supply-Settlement of the Jesuits' estates                                                                                                                                                                | Religion           | Private Member | Motion                   |
| H07S1V09 | 06.24.1891 | 0.857 | That in the opinion of this House, the time has arrived when it is expedient to prohibit the manufacture, importation and sale of intoxicating liquors for beverage purposes                             | Prohibition        | Private Member | Motion                   |
| H07S1V13 | 07.20.1891 | 0.522 | An act for the relief of Adam Russworm                                                                                                                                                                   | Divorce/Marriage   | Private Member | Private Bill             |
| H07S2V11 | 05.11.1892 | 0.576 | Bill further to amend the Acts respecting the North-West Territories                                                                                                                                     | Province           | Private Member | Public Bill              |
| H07S2V12 | 05.16.1892 | 0.484 | An Act for the relief of Herbert Rimmington Mead                                                                                                                                                         | Divorce/Marriage   | Private Member | Private Bill             |
| H07S3V05 | 03.01.1893 | 0.387 | That is expedient to place corn on the free list                                                                                                                                                         | Duty/Tariffs/Trade | Private Member | Motion                   |
| H07S4V04 | 05.09.1894 | 0.581 | An Act for the relief of Caroline Jane Downey                                                                                                                                                            | Divorce/Marriage   | Private Member | Private Bill             |
| H07S4V22 | 07.13.1894 | 0.367 | An act for the relief of James StGeorge Dillon                                                                                                                                                           | Divorce/Marriage   | Private Member | Private Bill             |
| H07S4V26 | 07.17.1894 | 0.286 | Bill further to amend the acts respecting the North-West Territories                                                                                                                                     | Language/Education | Government     | Opposition Amendment     |
| H07S5V04 | 06.05.1895 | 0.319 | The privilege of voting for candidates for membership thereof, should be extended to women possessing the qualifications which now entitle men to electoral franchise                                    | Democratic Reform  | Private Member | Motion                   |

|          |            |       |                                                                                                                                                                                                                   |                |                |                          |
|----------|------------|-------|-------------------------------------------------------------------------------------------------------------------------------------------------------------------------------------------------------------------|----------------|----------------|--------------------------|
| H07S6V02 | 02.24.1896 | 0.326 | That in the opinion of this House, the time has arrived when it is expedient to prohibit the manufacture, importation and sale of intoxicating liquors for beverage purposes                                      | Prohibition    | Private Member | Motion                   |
| H07S6V11 | 04.04.1896 | 0.500 | Votes and proceeding should correctly show the proceedings and transactions of the House                                                                                                                          | Procedure      | Private Member | Motion                   |
| H08S3V04 | 03.23.1898 | 0.235 | Bill to secure the better observance of the Lord's Day                                                                                                                                                            | Religion       | Private Member | Public Bill              |
| H08S3V08 | 03.28.1898 | 0.200 | Bill respecting the Ontario and Rainy River Railway Company                                                                                                                                                       | Railways       | Private Member | Private Bill             |
| H08S3V13 | 05.09.1898 | 0.222 | Bill further to secure the safety of Railway employees and passengers                                                                                                                                             | Railways       | Private Member | Public Bill              |
| H08S3V15 | 05.25.1898 | 0.214 | Bill to incorporate the Supreme Grand Lodge of the Sons of England Benefit Society                                                                                                                                | Religion       | Private Member | Private Bill             |
| H08S4V01 | 04.18.1899 | 0.611 | Committee Quorum be reduced from Eleven to Seven Members                                                                                                                                                          | Procedure      | Government     | Government Amendment     |
| H08S4V06 | 05.10.1899 | 0.520 | Bill to amend the Criminal Code, 1892, so as to make more effectual provision for the punishment of seduction and abduction                                                                                       | Criminal code  | Private Member | Public Bill              |
| H08S5V02 | 03.13.1900 | 0.625 | Supply: this House insists on the principle of the sovereignty and the independence of Parliament as the basis of British Institutions and the safeguard of the civil [...] South African War                     | Boer War       | Government     | Speaker Leaves the Chair |
| H08S5V05 | 03.26.1900 | 0.308 | That the maximum rate of a passenger traffic on any of the railways to be [...]                                                                                                                                   | Railways       | Government     | Speaker Leaves the Chair |
| H08S5V06 | 03.26.1900 | 0.421 | All books shall be open to inspection by the Government                                                                                                                                                           | Railways       | Government     | Speaker Leaves the Chair |
| H08S5V07 | 04.09.1900 | 0.300 | No Chinese person shall be employed in the construction or operation of the railway                                                                                                                               | Railways       | Private Member | Private Bill             |
| H08S5V12 | 05.30.1900 | 0.444 | Bill respecting the Grain Trade Inspection District of Manitoba                                                                                                                                                   | Railways       | Government     | Third Reading            |
| H08S5V26 | 06.21.1900 | 0.667 | Supply-Exemption from taxation of the said land grant end Canadian Pacific                                                                                                                                        | Railways       | Government     | Speaker Leaves the Chair |
| H08S5V33 | 07.06.1900 | 0.303 | Bill to amend the Railway Act, land drainage                                                                                                                                                                      | Railways       | Government     | Opposition Amendment     |
| H09S1V13 | 05.07.1901 | 0.400 | Committee on the bill relating to an agreement between the Government of Manitoba and the Canadian Northern Railway Company, respecting certain railways                                                          | Railways       | Government     | Opposition Amendment     |
| H09S1V17 | 05.17.1901 | 0.300 | That the third reading of the bill (Bill to incorporate the Brockville and Sault Ste Marie Railway Company) be proceeded with forthwith                                                                           | Railway        | Private Member | Private Bill             |
| H09S2V15 | 05.12.1902 | 0.206 | Bill to incorporate the Bishop of the Russo-Greek Catholic Church for the North America and Aleutian Islands, and each of the parishes and missions of the said Church in Manitoba and the North-west Territories | Religion       | Private Member | Private Bill             |
| H09S3V18 | 07.28.1903 | 0.222 | Bill to incorporate the Canadian Telephone and Telegraph Company                                                                                                                                                  | Local Industry | Private Member | Private Bill             |
| H10S1V03 | 03.29.1905 | 0.255 | Bill respecting the Ottawa Electric Company                                                                                                                                                                       | Local Industry | Government     | Opposition Amendment     |
| H10S1V08 | 07.05.1905 | 1.000 | Bill to establish and provide for the Government of the Province of Alberta                                                                                                                                       | Province       | Government     | Opposition Amendment     |
| H10S1V10 | 07.05.1905 | 1.000 | Bill to establish and provide for the Government of the Province of Alberta                                                                                                                                       | Province       | Government     | Government Amendment     |
| H10S1V11 | 07.05.1905 | 1.000 | Bill to establish and provide for the Government of the Province of Alberta                                                                                                                                       | Province       | Government     | Government Amendment     |
| H10S1V12 | 07.05.1905 | 1.000 | Bill to establish and provide for the Government of the Province of Alberta                                                                                                                                       | Province       | Government     | Opposition Amendment     |

|          |            |       |                                                                                                             |                                   |                |                      |
|----------|------------|-------|-------------------------------------------------------------------------------------------------------------|-----------------------------------|----------------|----------------------|
| H10S1V14 | 07.06.1905 | 0.375 | Bill to establish and provide for the Government of the Province of Alberta                                 | Province                          | Government     | Opposition Amendment |
| H10S1V15 | 07.06.1905 | 1.000 | Bill to establish and provide for the Government of the Province of Alberta                                 | Province                          | Government     | Opposition Amendment |
| H10S2V06 | 05.10.1906 | 0.889 | Bill respecting Annuities for certain privy councillors, and respecting the Senate and the House of Commons | Civil service/Military/Management | Private Member | Public Bill          |
| H10S2V22 | 07.06.1906 | 0.786 | Bill respecting the Lord's day                                                                              | Religion                          | Government     | Government Amendment |
| H10S2V23 | 07.07.1906 | 0.786 | Bill respecting the Lord's day                                                                              | Religion                          | Government     | Opposition Amendment |
| H10S2V13 | 03.03.1908 | 0.400 | Bill respecting the Lord's day                                                                              | Religion                          | Government     | Opposition Amendment |
